# Supplementary material for: Histamine H4 Receptor Agonism Induces Antitumor Effects in Human T-Cell Lymphoma
Source: MDPI journal article supplement (doi:10.3390/ijms23031378), 2022-01-26
Supplement: s1 [file s1]

## Supplementary Materials

**Table S1: List of a library of 433 FDA-approved compounds.**

| Number | Drug                          |
|--------|-------------------------------|
| 1      | FG-4592                       |
| 2      | Rizatriptan Benzoate          |
| 3      | Fulvestrant                   |
| 4      | Tolfenamic Acid               |
| 5      | Ramelteon                     |
| 6      | Trospium chloride             |
| 7      | Granisetron HCl               |
| 8      | A-769662                      |
| 9      | Losartan Potassium (DuP 753)  |
| 10     | Tolazoline HCl                |
| 11     | Tenofovir Disoproxil Fumarate |
| 12     | Ataluren (PTC124)             |
| 13     | Candesartan                   |
| 14     | Belinostat (PXD101)           |
| 15     | Semagacestat (LY450139)       |
| 16     | NVP-ADW742                    |
| 17     | NSC 319726                    |
| 18     | Icotinib                      |
| 19     | Ilomastat (GM6001, Galardin)  |
| 20     | Rivaroxaban                   |
| 21     | STF-118804                    |
| 22     | Rimonabant                    |
| 23     | FLI-06                        |
| 24     | Sitaxentan sodium             |
| 25     | ABT-263 (Navitoclax)          |
| 26     | Brinzolamide                  |
| 27     | Nilotinib (AMN-107)           |
| 28     | Tranylcypromine (2-PCPA) HCl  |
| 29     | Tandutinib (MLN518)           |
| 30     | Zebularine                    |
| 31     | MLN8054                       |
| 32     | PR-619                        |
| 33     | Roxatidine Acetate HCl        |

|    |                                      |
|----|--------------------------------------|
| 34 | GSK1904529A                          |
| 35 | Atorvastatin Calcium                 |
| 36 | SNS-032 (BMS-387032)                 |
| 37 | Naltrexone HCl                       |
| 38 | Ganetespib (STA-9090)                |
| 39 | CGS 21680 HCl                        |
| 40 | Vemurafenib (PLX4032, RG7204)        |
| 41 | Pancuronium dibromide                |
| 42 | Loratadine                           |
| 43 | PNU-120596                           |
| 44 | Ruxolitinib (INCB018424)             |
| 45 | GW3965 HCl                           |
| 46 | AZD6482                              |
| 47 | SB705498                             |
| 48 | Safinamide Mesylate                  |
| 49 | Tenofovir                            |
| 50 | P22077                               |
| 51 | Aloxistatin                          |
| 52 | NSC697923                            |
| 53 | Apixaban                             |
| 54 | ML347                                |
| 55 | Irinotecan HCl Trihydrate            |
| 56 | SSR128129E                           |
| 57 | VX-765                               |
| 58 | Ferrostatin-1 (Fer-1)                |
| 59 | Rotundine                            |
| 60 | MM-102                               |
| 61 | PF-3845                              |
| 62 | OTX015                               |
| 63 | Ibrutinib (PCI-32765)                |
| 64 | 4E1RCat                              |
| 65 | Tofacitinib (CP-690550, Tasocitinib) |
| 66 | PHA-793887                           |
| 67 | WZ811                                |
| 68 | Allopurinol                          |
| 69 | HC-030031                            |
| 70 | Telmisartan                          |
| 71 | Mozavaptan                           |
| 72 | Cyproterone Acetate                  |

|     |                                  |
|-----|----------------------------------|
| 73  | Sodium 4-Aminosalicylate         |
| 74  | GSK1292263                       |
| 75  | SGC 0946                         |
| 76  | LY2157299                        |
| 77  | IPA-3                            |
| 78  | Esomeprazole Sodium              |
| 79  | DMH1                             |
| 80  | Ozagrel                          |
| 81  | AZD4547                          |
| 82  | GW9508                           |
| 83  | VE-821                           |
| 84  | NSC 405020                       |
| 85  | GNF-2                            |
| 86  | TPCA-1                           |
| 87  | T0901317                         |
| 88  | PD0325901                        |
| 89  | PYR-41                           |
| 90  | U0126-EtOH                       |
| 91  | LDN-212854                       |
| 92  | Ki16425                          |
| 93  | C646                             |
| 94  | Oxcarbazepine                    |
| 95  | Mdivi-1                          |
| 96  | MRS 2578                         |
| 97  | AGI-5198                         |
| 98  | LY2603618                        |
| 99  | BTB06584                         |
| 100 | NPS-2143                         |
| 101 | Veliparib (ABT-888)              |
| 102 | Dalcetrapib (JTT-705, RO4607381) |
| 103 | Vandetanib (ZD6474)              |
| 104 | Istradefylline                   |
| 105 | Iniparib (BSI-201)               |
| 106 | Dabrafenib (GSK2118436)          |
| 107 | Finasteride                      |
| 108 | Tyrphostin AG 879                |
| 109 | Cilomilast                       |
| 110 | TAE226 (NVP-TAE226)              |
| 111 | Ozagrel HCl                      |

|     |                        |
|-----|------------------------|
| 112 | Vildagliptin (LAF-237) |
| 113 | Dynasore               |
| 114 | Piceatannol            |
| 115 | Quizartinib (AC220)    |
| 116 | Tenovin-6              |
| 117 | Enzastaurin (LY317615) |
| 118 | CGP 57380              |
| 119 | Bisoprolol fumarate    |
| 120 | Bosutinib (SKI-606)    |
| 121 | S3I-201                |
| 122 | HA14-1                 |
| 123 | TG100-115              |
| 124 | ADL5859 HCl            |
| 125 | Voriconazole           |
| 126 | BIBR 1532              |
| 127 | Thiazovivin            |
| 128 | Anastrozole            |
| 129 | SB743921               |
| 130 | EUK 134                |
| 131 | Bergenin               |
| 132 | SN-38                  |
| 133 | CP-91149               |
| 134 | Wnt-C59 (C59)          |
| 135 | NU7026                 |
| 136 | BAM7                   |
| 137 | ZM 306416              |
| 138 | (+)-JQ1                |
| 139 | GW9662                 |
| 140 | KPT-185                |
| 141 | Pifithrin- $\mu$       |
| 142 | Batimastat (BB-94)     |
| 143 | Sertraline HCl         |
| 144 | OG-L002                |
| 145 | MK-1775                |
| 146 | Costunolide            |
| 147 | AT101                  |
| 148 | GSK690693              |
| 149 | Tropicamide            |
| 150 | BMS-707035             |

|     |                              |
|-----|------------------------------|
| 151 | Raltegravir (MK-0518)        |
| 152 | EX 527 (Selisistat)          |
| 153 | CCT128930                    |
| 154 | Pomalidomide                 |
| 155 | AS-252424                    |
| 156 | Tie2 kinase inhibitor        |
| 157 | Ouabain                      |
| 158 | Ranitidine                   |
| 159 | SKI II                       |
| 160 | Fluvastatin Sodium           |
| 161 | Propranolol HCl              |
| 162 | Erastin                      |
| 163 | Ifenprodil Tartrate          |
| 164 | KPT-276                      |
| 165 | AZD2461                      |
| 166 | KPT-330                      |
| 167 | AGI-6780                     |
| 168 | SGL-1027                     |
| 169 | Atglistatin                  |
| 170 | Suvorexant (MK-4305)         |
| 171 | SRT1720                      |
| 172 | 4EGI-1                       |
| 173 | Exemestane                   |
| 174 | NSC 23766                    |
| 175 | 2-Methoxyestradiol (2-MeOE2) |
| 176 | Palbociclib (PD-0332991) HCl |
| 177 | EHop-016                     |
| 178 | PF-573228                    |
| 179 | ABT-199 (GDC-0199)           |
| 180 | Memantine HCl                |
| 181 | PTC-209                      |
| 182 | Trimebutine                  |
| 183 | CK-636                       |
| 184 | SGL-1776 free base           |
| 185 | AZD7545                      |
| 186 | URB597                       |
| 187 | GW0742                       |
| 188 | TAK-875                      |
| 189 | Pacritinib (SB1518)          |

|     |                                    |
|-----|------------------------------------|
| 190 | KX2-391                            |
| 191 | PluriSIn #1 (NSC 14613)            |
| 192 | Crenolanib (CP-868596)             |
| 193 | Enzalutamide (MDV3100)             |
| 194 | PFI-1 (PF-6405761)                 |
| 195 | Dapagliflozin                      |
| 196 | Maraviroc                          |
| 197 | Nebivolol                          |
| 198 | I-BET151 (GSK1210151A)             |
| 199 | VX-809 (Lumacaftor)                |
| 200 | Apoptosis Activator 2              |
| 201 | Naproxen                           |
| 202 | Bosentan Hydrate                   |
| 203 | Acadesine                          |
| 204 | E-64                               |
| 205 | Captopril                          |
| 206 | Selumetinib (AZD6244)              |
| 207 | Tolvaptan                          |
| 208 | PD184352 (CI-1040)                 |
| 209 | OSI-906 (Linsitinib)               |
| 210 | Canagliflozin                      |
| 211 | CP-673451                          |
| 212 | Sirtinol                           |
| 213 | Abitrexate (Methotrexate)          |
| 214 | SAR131675                          |
| 215 | Pralatrexate                       |
| 216 | BML-190                            |
| 217 | TWS119                             |
| 218 | IKK-16 (IKK Inhibitor VII)         |
| 219 | Enalaprilat Dihydrate              |
| 220 | Triamterene                        |
| 221 | Clemastine Fumarate                |
| 222 | Fingolimod (FTY720) HCl            |
| 223 | Amlodipine                         |
| 224 | PP2                                |
| 225 | CHIR-124                           |
| 226 | Temsirolimus (CCI-779, NSC 683864) |
| 227 | YO-01027                           |
| 228 | Trichostatin A (TSA)               |

|     |                                  |
|-----|----------------------------------|
| 229 | PAC-1                            |
| 230 | PHA-665752                       |
| 231 | VE-822                           |
| 232 | SB203580                         |
| 233 | EPZ-6438                         |
| 234 | KU-55933 (ATM Kinase Inhibitor)  |
| 235 | CGK 733                          |
| 236 | WZ4002                           |
| 237 | WZ4003                           |
| 238 | TAK-700 (Orteronel)              |
| 239 | Loxistatin Acid (E-64C)          |
| 240 | Zibotentan (ZD4054)              |
| 241 | Pyrimethamine                    |
| 242 | RKI-1447                         |
| 243 | UNC2250                          |
| 244 | SMI-4a                           |
| 245 | SB415286                         |
| 246 | PRT062607 (P505-15, BIIB057) HCl |
| 247 | Torcetrapib                      |
| 248 | MK-2206 2HCl                     |
| 249 | ML130 (Nodinitib-1)              |
| 250 | PF-04217903                      |
| 251 | GW441756                         |
| 252 | Varespladib (LY315920)           |
| 253 | ML161                            |
| 254 | MK-2866 (GTx-024)                |
| 255 | Ticagrelor                       |
| 256 | Letrozole                        |
| 257 | GW2580                           |
| 258 | Zosuquidar (LY335979) 3HCl       |
| 259 | KU-60019                         |
| 260 | LY2228820                        |
| 261 | MLN2238                          |
| 262 | Org 27569                        |
| 263 | Oxymetazoline HCl                |
| 264 | DMXAA (Vadimezan)                |
| 265 | Anacetrapib (MK-0859)            |
| 266 | AM1241                           |
| 267 | Embelin                          |

|     |                                      |
|-----|--------------------------------------|
| 268 | Toremifene Citrate                   |
| 269 | GSK2656157                           |
| 270 | Felodipine                           |
| 271 | (+)-Bicuculline                      |
| 272 | Ticlopidine HCl                      |
| 273 | SANT-1                               |
| 274 | Ispinesib (SB-715992)                |
| 275 | BTZ043 Racemate                      |
| 276 | AZD7762                              |
| 277 | AVL-292                              |
| 278 | Pimobendan                           |
| 279 | DBeQ                                 |
| 280 | Formoterol Hemifumarate              |
| 281 | CNX-774                              |
| 282 | Lovastatin                           |
| 283 | 4 $\mu$ 8C                           |
| 284 | Lafutidine                           |
| 285 | AZ191                                |
| 286 | (-)-Parthenolide                     |
| 287 | JSH-23                               |
| 288 | Pramipexole                          |
| 289 | RepSox                               |
| 290 | Bazedoxifene HCl                     |
| 291 | Golgicide A                          |
| 292 | LDE225 (NVP-LDE225,Erismodegib)      |
| 293 | Ridaforolimus (Deforolimus, MK-8669) |
| 294 | LY2784544                            |
| 295 | SNS-314 Mesylate                     |
| 296 | BGJ398 (NVP-BGJ398)                  |
| 297 | Irinotecan                           |
| 298 | OSI-420                              |
| 299 | Dutasteride                          |
| 300 | Apigenin                             |
| 301 | Rigosertib (ON-01910)                |
| 302 | Forskolin                            |
| 303 | Rolipram                             |
| 304 | Bupivacaine HCl                      |
| 305 | UNC669                               |
| 306 | Tioxolone                            |



|     |                                                       |
|-----|-------------------------------------------------------|
| 307 | PF-4708671                                            |
| 308 | 5-hydroxymethyl Tolterodine (PNU 200577, 5-HMT, 5-HM) |
| 309 | XAV-939                                               |
| 310 | SB742457                                              |
| 311 | Cinacalcet HCl                                        |
| 312 | Linagliptin                                           |
| 313 | Etomidate                                             |
| 314 | Entacapone                                            |
| 315 | AG-14361                                              |
| 316 | Moclobemide (Ro 111163)                               |
| 317 | LY411575                                              |
| 318 | GDC-0152                                              |
| 319 | OC000459                                              |
| 320 | NLG919                                                |
| 321 | Levosulpiride                                         |
| 322 | Imatinib (STI571)                                     |
| 323 | DCC-2036 (Rebastinib)                                 |
| 324 | XL335                                                 |
| 325 | Nilvadipine                                           |
| 326 | CHIR-98014                                            |
| 327 | GW4064                                                |
| 328 | PF-5274857                                            |
| 329 | GDC-0068                                              |
| 330 | JNJ-1661010                                           |
| 331 | VU 0364770                                            |
| 332 | U-104                                                 |
| 333 | Daunorubicin HCl                                      |
| 334 | PF-562271                                             |
| 335 | AZD3463                                               |
| 336 | IOX2                                                  |
| 337 | IMD 0354                                              |
| 338 | CRT0044876                                            |
| 339 | TCID                                                  |
| 340 | LB42708                                               |
| 341 | Necrostatin-1                                         |
| 342 | Empagliflozin (BI 10773)                              |
| 343 | SU11274                                               |
| 344 | Bortezomib (PS-341)                                   |
| 345 | YM155 (Sepantronium Bromide)                          |

|     |                              |
|-----|------------------------------|
| 346 | Lenalidomide (CC-5013)       |
| 347 | Ivacaftor (VX-770)           |
| 348 | AUY922 (NVP-AUY922)          |
| 349 | Agomelatine                  |
| 350 | 17-AAG (Tanespimycin)        |
| 351 | SP600125                     |
| 352 | CEP-18770 (Delanzomib)       |
| 353 | Aprepitant                   |
| 354 | Fluvoxamine maleate          |
| 355 | Oligomycin A                 |
| 356 | Ginkgolide A                 |
| 357 | Cryptotanshinone             |
| 358 | ICG-001                      |
| 359 | Stattic                      |
| 360 | SC144                        |
| 361 | SRPIN340                     |
| 362 | Trelagliptin                 |
| 363 | Panobinostat (LBH589)        |
| 364 | VX-680 (Tozasertib, MK-0457) |
| 365 | GDC-0941                     |
| 366 | OSU-03012 (AR-12)            |
| 367 | GSK690693                    |
| 368 | Everolimus (RAD001)          |
| 369 | MK-8245                      |
| 370 | Aniracetam                   |
| 371 | Doxazosin Mesylate           |
| 372 | Ginkgolide B                 |
| 373 | Tosedostat (CHR2797)         |
| 374 | Rebamipide                   |
| 375 | Rasagiline Mesylate          |
| 376 | PD128907 HCl                 |
| 377 | Apatinib                     |
| 378 | ADX-47273                    |
| 379 | AZ 3146                      |
| 380 | VU 0357121                   |
| 381 | (-)-MK 801 Maleate           |
| 382 | Mirabegron                   |
| 383 | AP26113                      |
| 384 | Birinapant                   |

|     |                                 |
|-----|---------------------------------|
| 385 | AZD1981                         |
| 386 | LDK378                          |
| 387 | (S)-crizotinib                  |
| 388 | ZM 447439                       |
| 389 | BX-912                          |
| 390 | Tadalafil                       |
| 391 | Elvitegravir (GS-9137, JTK-303) |
| 392 | Fostamatinib (R788)             |
| 393 | GSK J4 HCl                      |
| 394 | TCS 359                         |
| 395 | Carvedilol                      |
| 396 | Naftopidil                      |
| 397 | ML133 HCl                       |
| 398 | T0070907                        |
| 399 | Gliquidone                      |
| 400 | SC-514                          |
| 401 | ZCL278                          |
| 402 | Caffeic Acid Phenethyl Ester    |
| 403 | VU 0364439                      |
| 404 | SB431542                        |
| 405 | Odanacatib (MK-0822)            |
| 406 | Celecoxib                       |
| 407 | Etodolac                        |
| 408 | Isotretinoin                    |
| 409 | Stavudine (d4T)                 |
| 410 | VX-745                          |
| 411 | GSK429286A                      |
| 412 | SB408124                        |
| 413 | H 89 2HCl                       |
| 414 | Mubritinib (TAK 165)            |
| 415 | BMS-378806                      |
| 416 | Ki16198                         |
| 417 | AZ20                            |
| 418 | AMG-517                         |
| 419 | NMS-873                         |
| 420 | Sorafenib                       |
| 421 | NH125                           |
| 422 | Sal003                          |
| 423 | Tariquidar                      |

|     |                                                       |
|-----|-------------------------------------------------------|
| 424 | Lomeguatrib                                           |
| 425 | BI 2536                                               |
| 426 | Imidapril HCl                                         |
| 427 | GSK461364                                             |
| 428 | Gliclazide                                            |
| 429 | Sotrastaurin                                          |
| 430 | BI-D1870                                              |
| 431 | Go 6983                                               |
| 432 | MNS (3,4-Methylenedioxy- $\beta$ -nitrostyrene, MDBN) |
| 433 | THZ1                                                  |

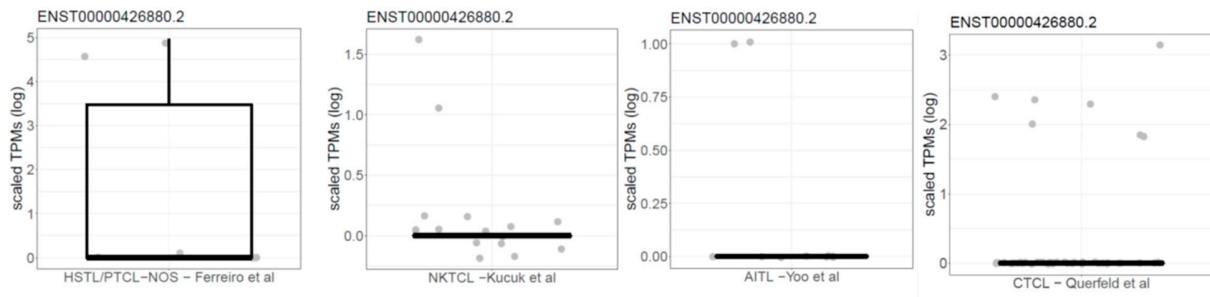

**Figure S1. *H4R* mRNA expression (ENST00000426880.2 transcript variant 2, short isoform) in tumors of TCL patients.** The transcriptional datasets of tumors from patients with AITL (accession number: SRP029591, n=10) [28], hepatosplenic TCL (HSTL)/PTCL-NOS (accession number: SRP039591, n=6) [30], NKTCL (accession number: SRP049695, n=15) [31], and CTCL (accession number: SRP139926, n=47) [32] were obtained from the NCBI Sequence Read Archive and analyzed as indicated in materials and methods. TPMs: transcripts per million.

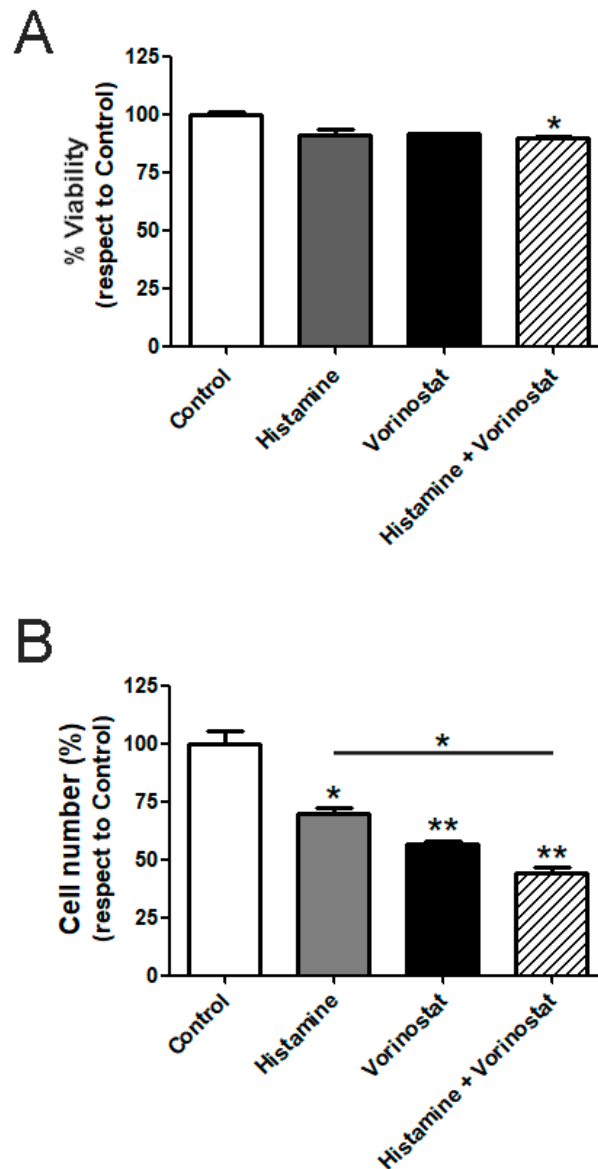

**Figure S2: Effect of the combination of histamine and vorinostat on HuT78 cell viability and cell number.** HuT78 cells were pre-incubated for 24 h in serum-free RPMI medium and then were left untreated (control) or were treated with histamine (10  $\mu$ M) and/or Vorinostat (1  $\mu$ M) for 48 h in complete medium, as indicated. A) Cell viability was evaluated by Cell Titer Blue Assay. B) The cell number was counted using a Neubauer chamber. Measurements were performed in triplicates for each condition and data are expressed as mean  $\pm$  SEM (n=3 independent experiments). \* indicates  $p < 0.05$ , \*\* indicates  $p < 0.01$  compared with Control.
